# Supplementary material for: Machine learning-coupled combinatorial mutagenesis enables resource-efficient engineering of CRISPR-Cas9 genome editor activities
Source: PubMed Central journal article supplement (PMC9039034; doi:10.1038/s41467-022-29874-5), 2022-04-25
Supplement: 41467_2022_29874_MOESM3_ESM.pdf [file 41467_2022_29874_MOESM3_ESM.pdf]

**Title: Supplementary Data 1**

**Description:** Number of pairwise sequences with N mismatches in the diverse dataset.

**Title: Supplementary Data 2**

**Description:** Performance of MLDE predictions on Sg5 and Sg8 on-target activities with SpCas9.

**Title: Supplementary Data 3**

**Description:** Performance of MLDE prediction on Sg5 off-target activities with SpCas9.

**Title: Supplementary Data 4**

**Description:** Performance of MLDE prediction on SpCas9's activity at NGN PAMs.

**Title: Supplementary Data 5**

**Description:** Amino acid residues selected for mutagenesis in this study.

**Title: Supplementary Data 6**

**Description:** Experimental enrichment scores determined for each KKH-SaCas9 variant with indicated sgRNAs.

**Title: Supplementary Data 7**

**Description:** Performance of MLDE predictions on KKH-saCas9's on-target activity with three sgRNAs.

**Title: Supplementary Data 8**

**Description:** Resource efficiency of identifying top-performing variants with or without applying machine learning.

**Title: Supplementary Data 9**

**Description:** List of constructs used in this work.

**Title: Supplementary Data 10**

**Description:** List of guide RNA protospacer sequences used in this study.

**Supplementary Data 11**

**Description:** List of primers and PCR conditions used for T7E1 assay.
